# Supplementary material for: Paleo±Dust: quantifying uncertainty in paleo-dust deposition across archive types
Source: Copernicus journal article supplement (doi:10.5194/essd-16-941-2024), 2024-02-20
Supplement: Supplementary file 1 [file essd-16-941-2024-supplement.zip]

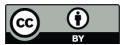

## *Supplement of*

# **Paleo $\pm$ Dust: quantifying uncertainty in paleo-dust deposition across archive types**

Nicolás J. Cosentino et al.

*Correspondence to:* Nicolás J. Cosentino ([nicolas.cosentino@cima.fcen.uba.ar](mailto:nicolas.cosentino@cima.fcen.uba.ar))

- [essd-16-941-2024-supplement-title-page.pdf](#)
- [main\\_LGM\\_tab.txt](#)
- [main\\_piHOL\\_tab.txt](#)
- [site\\_references.txt](#)
- [site\\_specific\\_notes\\_references.txt](#)
- [supporting\\_LGM\\_tab.txt](#)
- [supporting\\_piHOL\\_tab.txt](#)

The copyright of individual parts of the supplement might differ from the article licence.
